# Supplementary material for: Identification of biological signatures of cruciferous vegetable consumption utilizing machine learning-based global untargeted stable isotope traced metabolomics
Source: Front Nutr. 2024 Jul 3;11:1390223. doi: 10.3389/fnut.2024.1390223 (PMC11253721; doi:10.3389/fnut.2024.1390223)
Supplement: Supplementary file 5 [file Table_5.XLSX]

## Sheet: Sheet1
Table S5: Presence of labeled compounds in urine across treatment groups and time
Study	Ionization Mode	Compound		Broccoli Sprouts						Alfalfa Sprouts						Collards
		RT	m/z	0h	3h	6h	24h	48h	72h	0h	3h	6h	24h	48h	72h	24h
Broccoli Urine	Negative	23	426.102	No	Yes - Labeled	Yes - Labeled	No	No	No	No	No	No	No	No	No	No
		21.18	366.082	No	Yes - Labeled	Yes - Labeled	No	No	No	No	No	No	No	No	No	Yes -Not Labeled
		20.7	510.123	No	Yes - Labeled	Yes - Labeled	No	No	No	No	No	No	No	No	No	No
	Positive	23	404.095	No	Yes - Labeled	Yes - Labeled	No	No	No	No	No	No	No	No	No	No
		21.18	390.079	No	Yes - Labeled	Yes - Labeled	No	No	No	No	No	No	No	No	No	Yes -Not Labeled
		20.7	512.139	No	Yes - Labeled	Yes - Labeled	No	No	No	No	No	No	No	No	No	No
Collard Greens Urine	Negative	17.79	250.073	Yes - Not Labeled	Yes - Not labeled	Yes - Not labeled	Yes - Not labeled	Yes - Not labeled	Yes - Not labeled	Yes - Not Labeled	Yes - Not Labeled	Yes - Not Labeled	Yes - Not Labeled	Yes - Not Labeled	Yes - Not Labeled	Yes - Labeled
		15.91	251.014	No	No	No	No	No	No	No	No	No	No	No	No	Yes - Labeled
		18.97	289.039	Yes - Not Labeled	Yes - Not labeled	Yes - Not labeled	Yes - Not labeled	Yes - Not labeled	Yes - Not labeled	Yes - Not Labeled	Yes - Not Labeled	Yes - Not Labeled	Yes - Not Labeled	Yes - Not Labeled	Yes - Not Labeled	Yes - Labeled
		20	225.077	Yes - Not Labeled	Yes - Not labeled	Yes - Not labeled	Yes - Not labeled	Yes - Not labeled	Yes - Not labeled	Yes - Not Labeled	Yes - Not Labeled	Yes - Not Labeled	Yes - Not Labeled	Yes - Not Labeled	Yes - Not Labeled	Yes - Labeled
	Positive	20	227.091	Yes - Not Labeled	Yes - Not labeled	Yes - Not labeled	Yes - Not labeled	Yes - Not labeled	Yes - Not labeled	Yes - Not Labeled	Yes - Not labeled	Yes - Not labeled	Yes - Not labeled	Yes - Not labeled	Yes - Not labeled	Yes - Labeled
		20	249.073	Yes - Not Labeled	Yes - Not labeled	Yes - Not labeled	Yes - Not labeled	Yes - Not labeled	Yes - Not labeled	Yes - Not Labeled	Yes - Not labeled	Yes - Not labeled	Yes - Not labeled	Yes - Not labeled	Yes - Not labeled	Yes - Labeled
		21.17	304.249	Yes - Not Labeled	Yes - Not labeled	Yes - Not labeled	Yes - Not labeled	Yes - Not labeled	Yes - Not labeled	Yes - Not Labeled	Yes - Not labeled	Yes - Not labeled	Yes - Not labeled	Yes - Not labeled	Yes - Not labeled	Yes - Labeled
Yes or no indicates if the compound was present or not
Labeled or not labeled indicates if the compound had dueterium incorporation or not
